# Supplementary material for: LRH-1-dependent programming of mitochondrial glutamine processing drives liver cancer
Source: PubMed Central journal article supplement — Genes Dev. 2016 Jun 1;30(11):1255–60. doi: 10.1101/gad.277483.116 (PMC4911925; doi:10.1101/gad.277483.116), 2016-06-01
Supplement: supp_30.11.1255_Supplemental_Table.pdf [file supp_30.11.1255_Supplemental_Table.pdf]

Supplemental Table 1. qPCR and ChIP primer sequences.

| <b>Gene</b>     | <b>Forward primers</b>  | <b>Reverse primers</b>  |
|-----------------|-------------------------|-------------------------|
| Gls2            | GACCGTGGTGAACCTGCTAT    | TGCGGGAATCATAGTCCTTC    |
| Got1            | GACCATGAGATCCGAACTCA    | TGACCAAATACTCGACCTGC    |
| Gpt2            | GGACAACGTGTACTCTCCAG    | GGTGCAAATTGATCACCTCC    |
| Me1             | GATGATAAGGTCTTCCTCACC   | TACTGGTTGACTTTGGTCTGT   |
| c-Myc           | TGAGCCCCTAGTGCTGCAT     | AGCCCGACTCCGACCTCTT     |
| CyclinD1        | CATCCATGCGGAAAATCGT     | TCTACGCACTTCTGCTCCTCA   |
| CyclinE1        | CTGGCTGAATGTCTATGTCC    | TCTTTGCTTGGGCTTTGTCC    |
| Gls1            | AGTGACTTGTGAATCAGCCAG   | GTTGCCCATCTTATCCAGAGG   |
| Got2            | GAAGCAATGGTTGCAAGAGG    | GTCATGTAGACCGAGAACTC    |
| Pex             | AGGAAGGGGATGTTGGTCTT    | TCGTCAAGGTCATTGCACAC    |
| Cs              | ATTCGTGGAAGAAGCACTGG    | GCCATGGCTCTACTCACTGC    |
| Aco2            | GGTGACCAGGAGGCTGTAAG    | CCCAACATACACAGACACAACA  |
| Ogdh            | AAGTGGTGGTGGGTAAGTGG    | TGATGATGCTCCGGTAACTG    |
| Suclg1          | TAAGACCCGTGTCGTATCCC    | CAACCATGGTCTCCAGCAG     |
| Suclg2          | AGTTGACGATCCCACCAAAG    | TGGTGTAAGGAAGCCCAAG     |
| Pcca            | TCCTTGGGCACTTTTTCAAG    | AGGTGGAAACATGAGCATCC    |
| Sdha            | GGAACACTCCAAAAACAGACCT  | CCACCACTGGGTATTGAGTAGAA |
| Sdhb            | GGACCTATGGTGTGGATGC     | GTGTGCACGCCAGAGTATTG    |
| Mdh1            | TTCTGGACGGTGTCTCTGATG   | TTTCACATTGGCTTTCAGTAGGT |
| Mdh2            | TTGGGCAACCCCTTTCCTC     | GCCTTTCACATTTGCTCTGGTC  |
| Gck             | ACATTGTGCGCCGTGCCTGTGAA | AGCCTGCGCACACTGGCGTGAAA |
| Chrebp-a        | CGACACTCACCCACCTCTTC    | TTGTTTCAGCCGGATCTTGTC   |
| Chrebp-b        | TCTGCAGATCGCGTGGAG      | CTTGTCCTGGCATAGCAAC     |
| Gdh1            | CTATGGAGCTGGCCAAGAAG    | CCTATGGTGCTGGCATAGGT    |
| Plk3            | ACCTACAGCACCGCCATATC    | CGCAGGTAGTAGCGAACCTC    |
| Cyp2e1          | CTTAGGGAA AACCTCCGCAC   | GGGACATTCTGTGTTCCAG     |
| Mgmt            | CCTCTGTGGGGTCAGTGTTT    | CCTCTGTGGGGTCAGTGTTT    |
| <b>Promoter</b> | <b>Forward primers</b>  | <b>Reverse primers</b>  |
| GLS2-1 and 2    | AGAGGCAGGCGGATTTCT      | AAGCCAGTGAACCTCAAATCTTC |
| GLS2-3          | TGCCTGTAAGTGTGCACTGG    | GTGCTCTGGTGCAGATGAAA    |
| GLS2-4 and 5    | TTTCATCTGCACCAGAGCAC    | CTGGGACAGTCGGGACAC      |
