# Supplementary figures and images for: LRH-1-dependent programming of mitochondrial glutamine processing drives liver cancer
Source: PubMed Central journal article supplement — Genes Dev. 2016 Jun 1;30(11):1255–60. doi: 10.1101/gad.277483.116 (PMC4911925; doi:10.1101/gad.277483.116), 2016-06-01

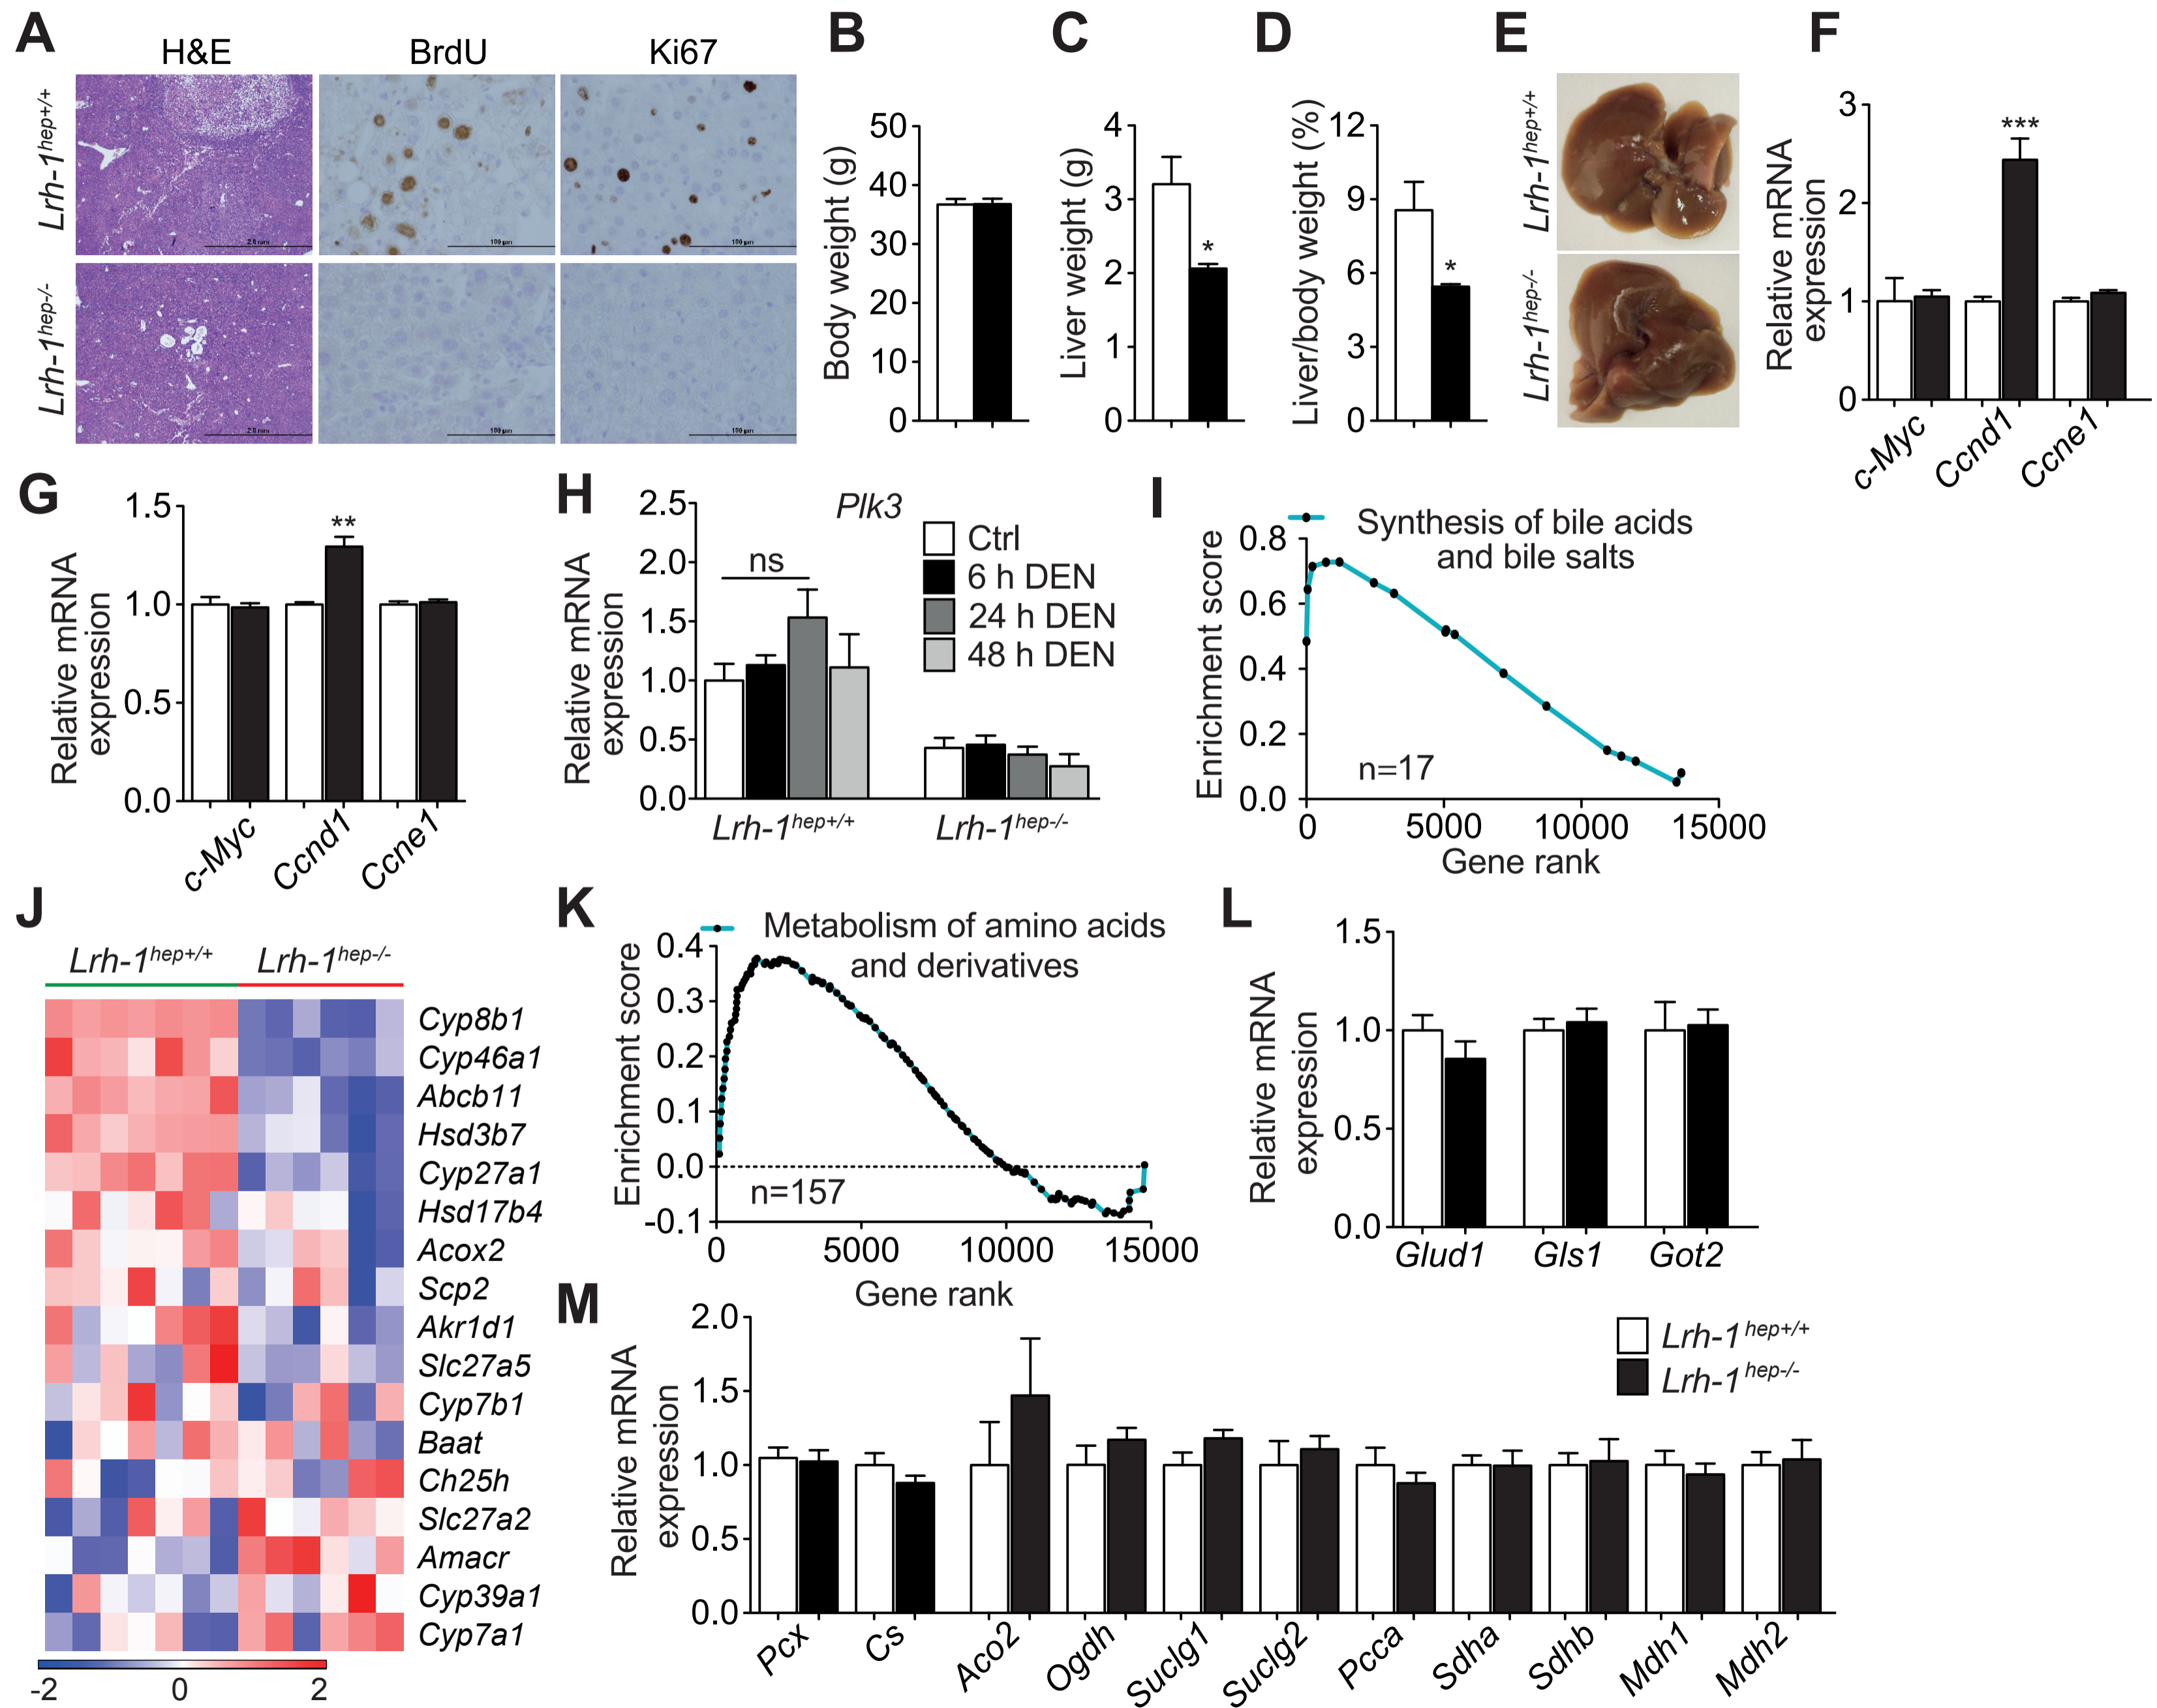

# Xu\_Supplemental Fig.2

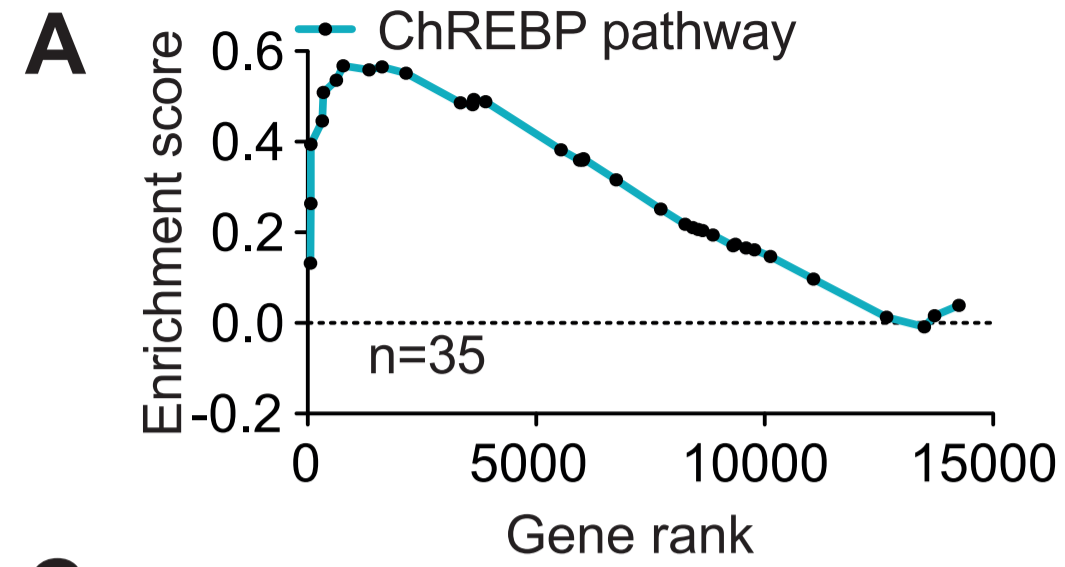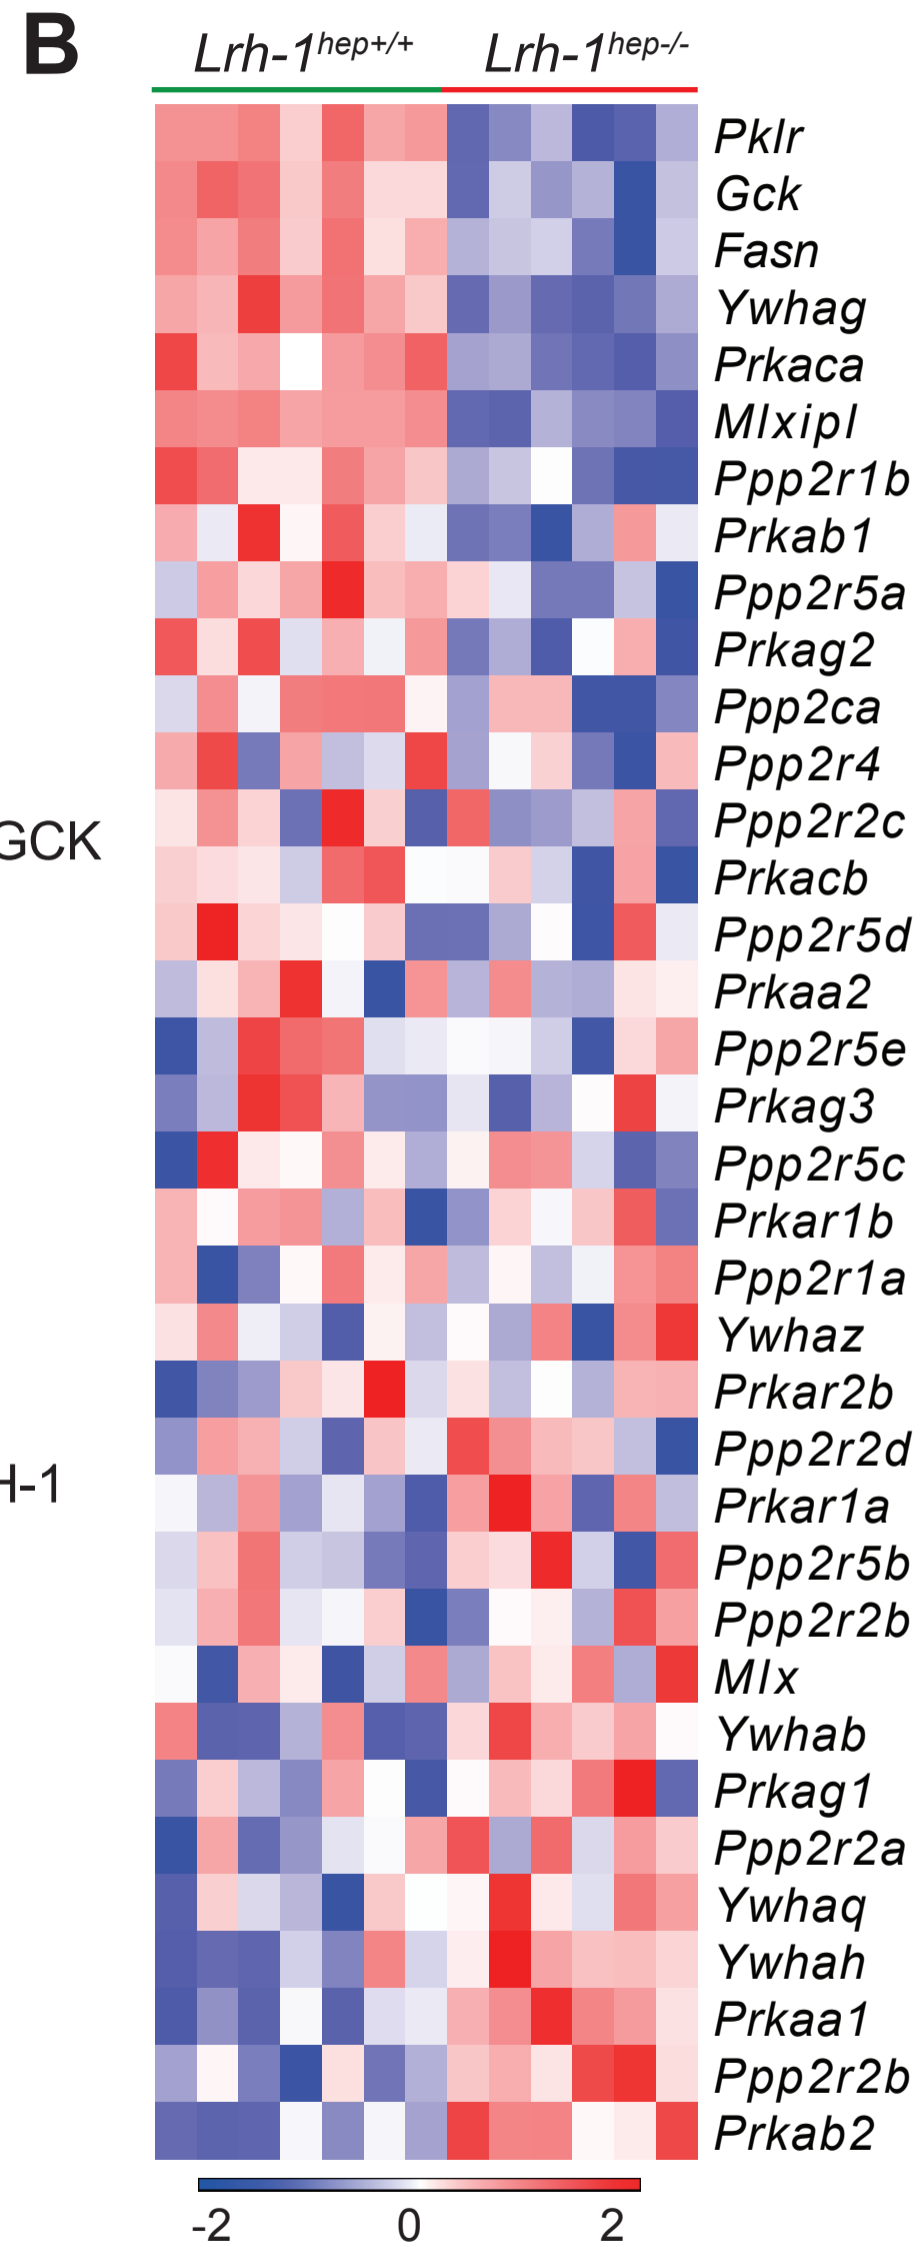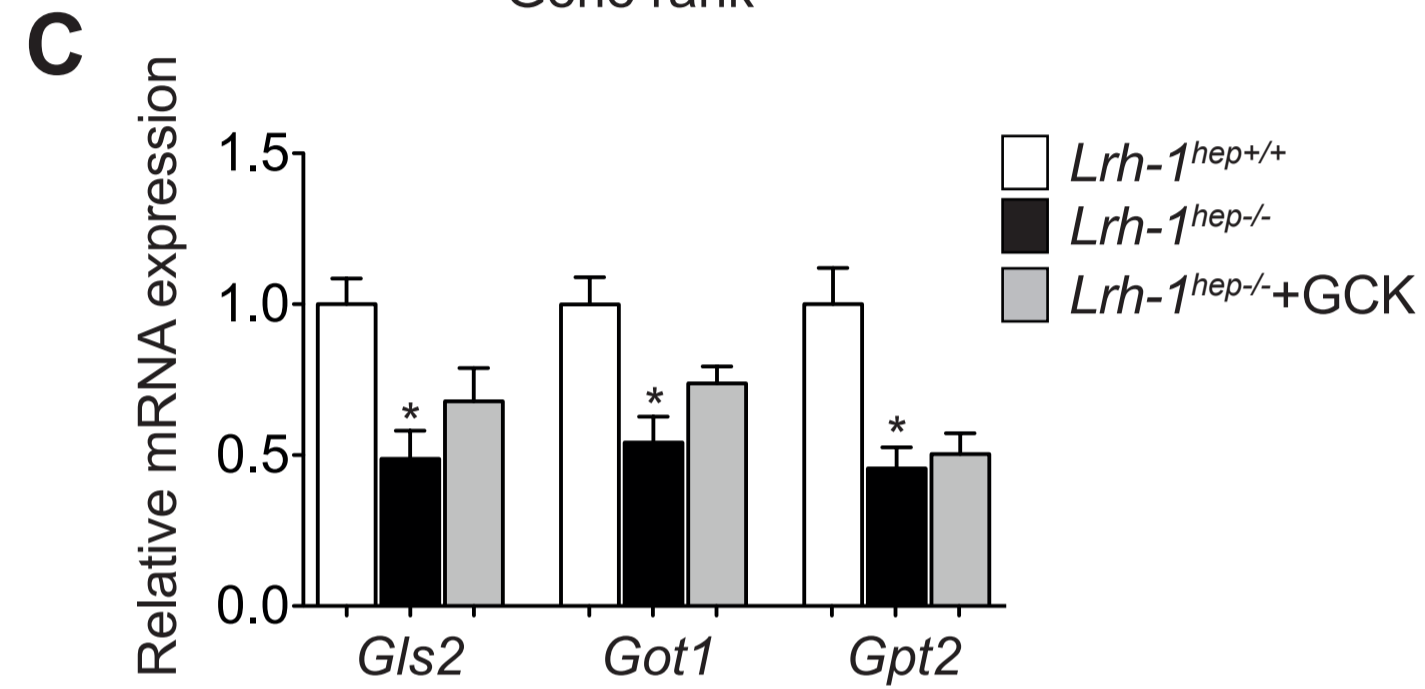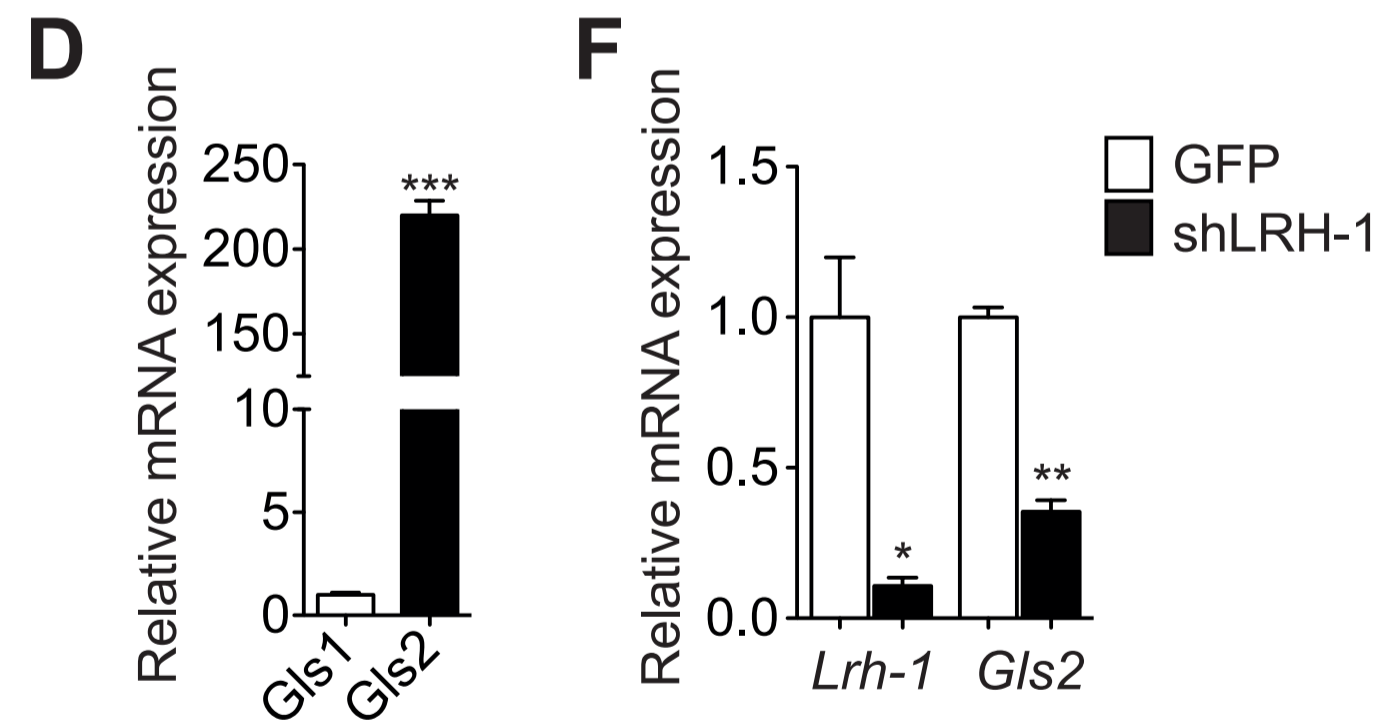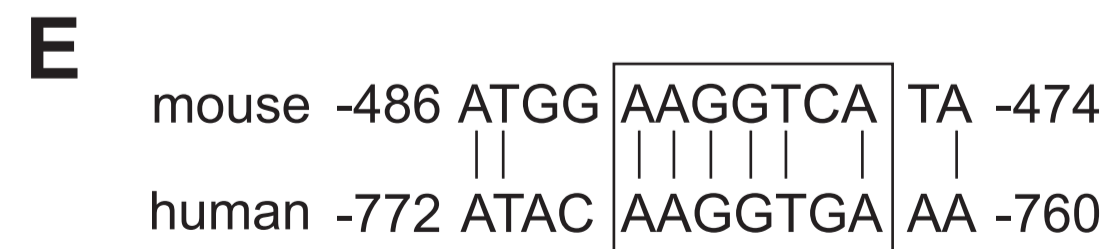

# Xu\_Supplemental Fig. 3

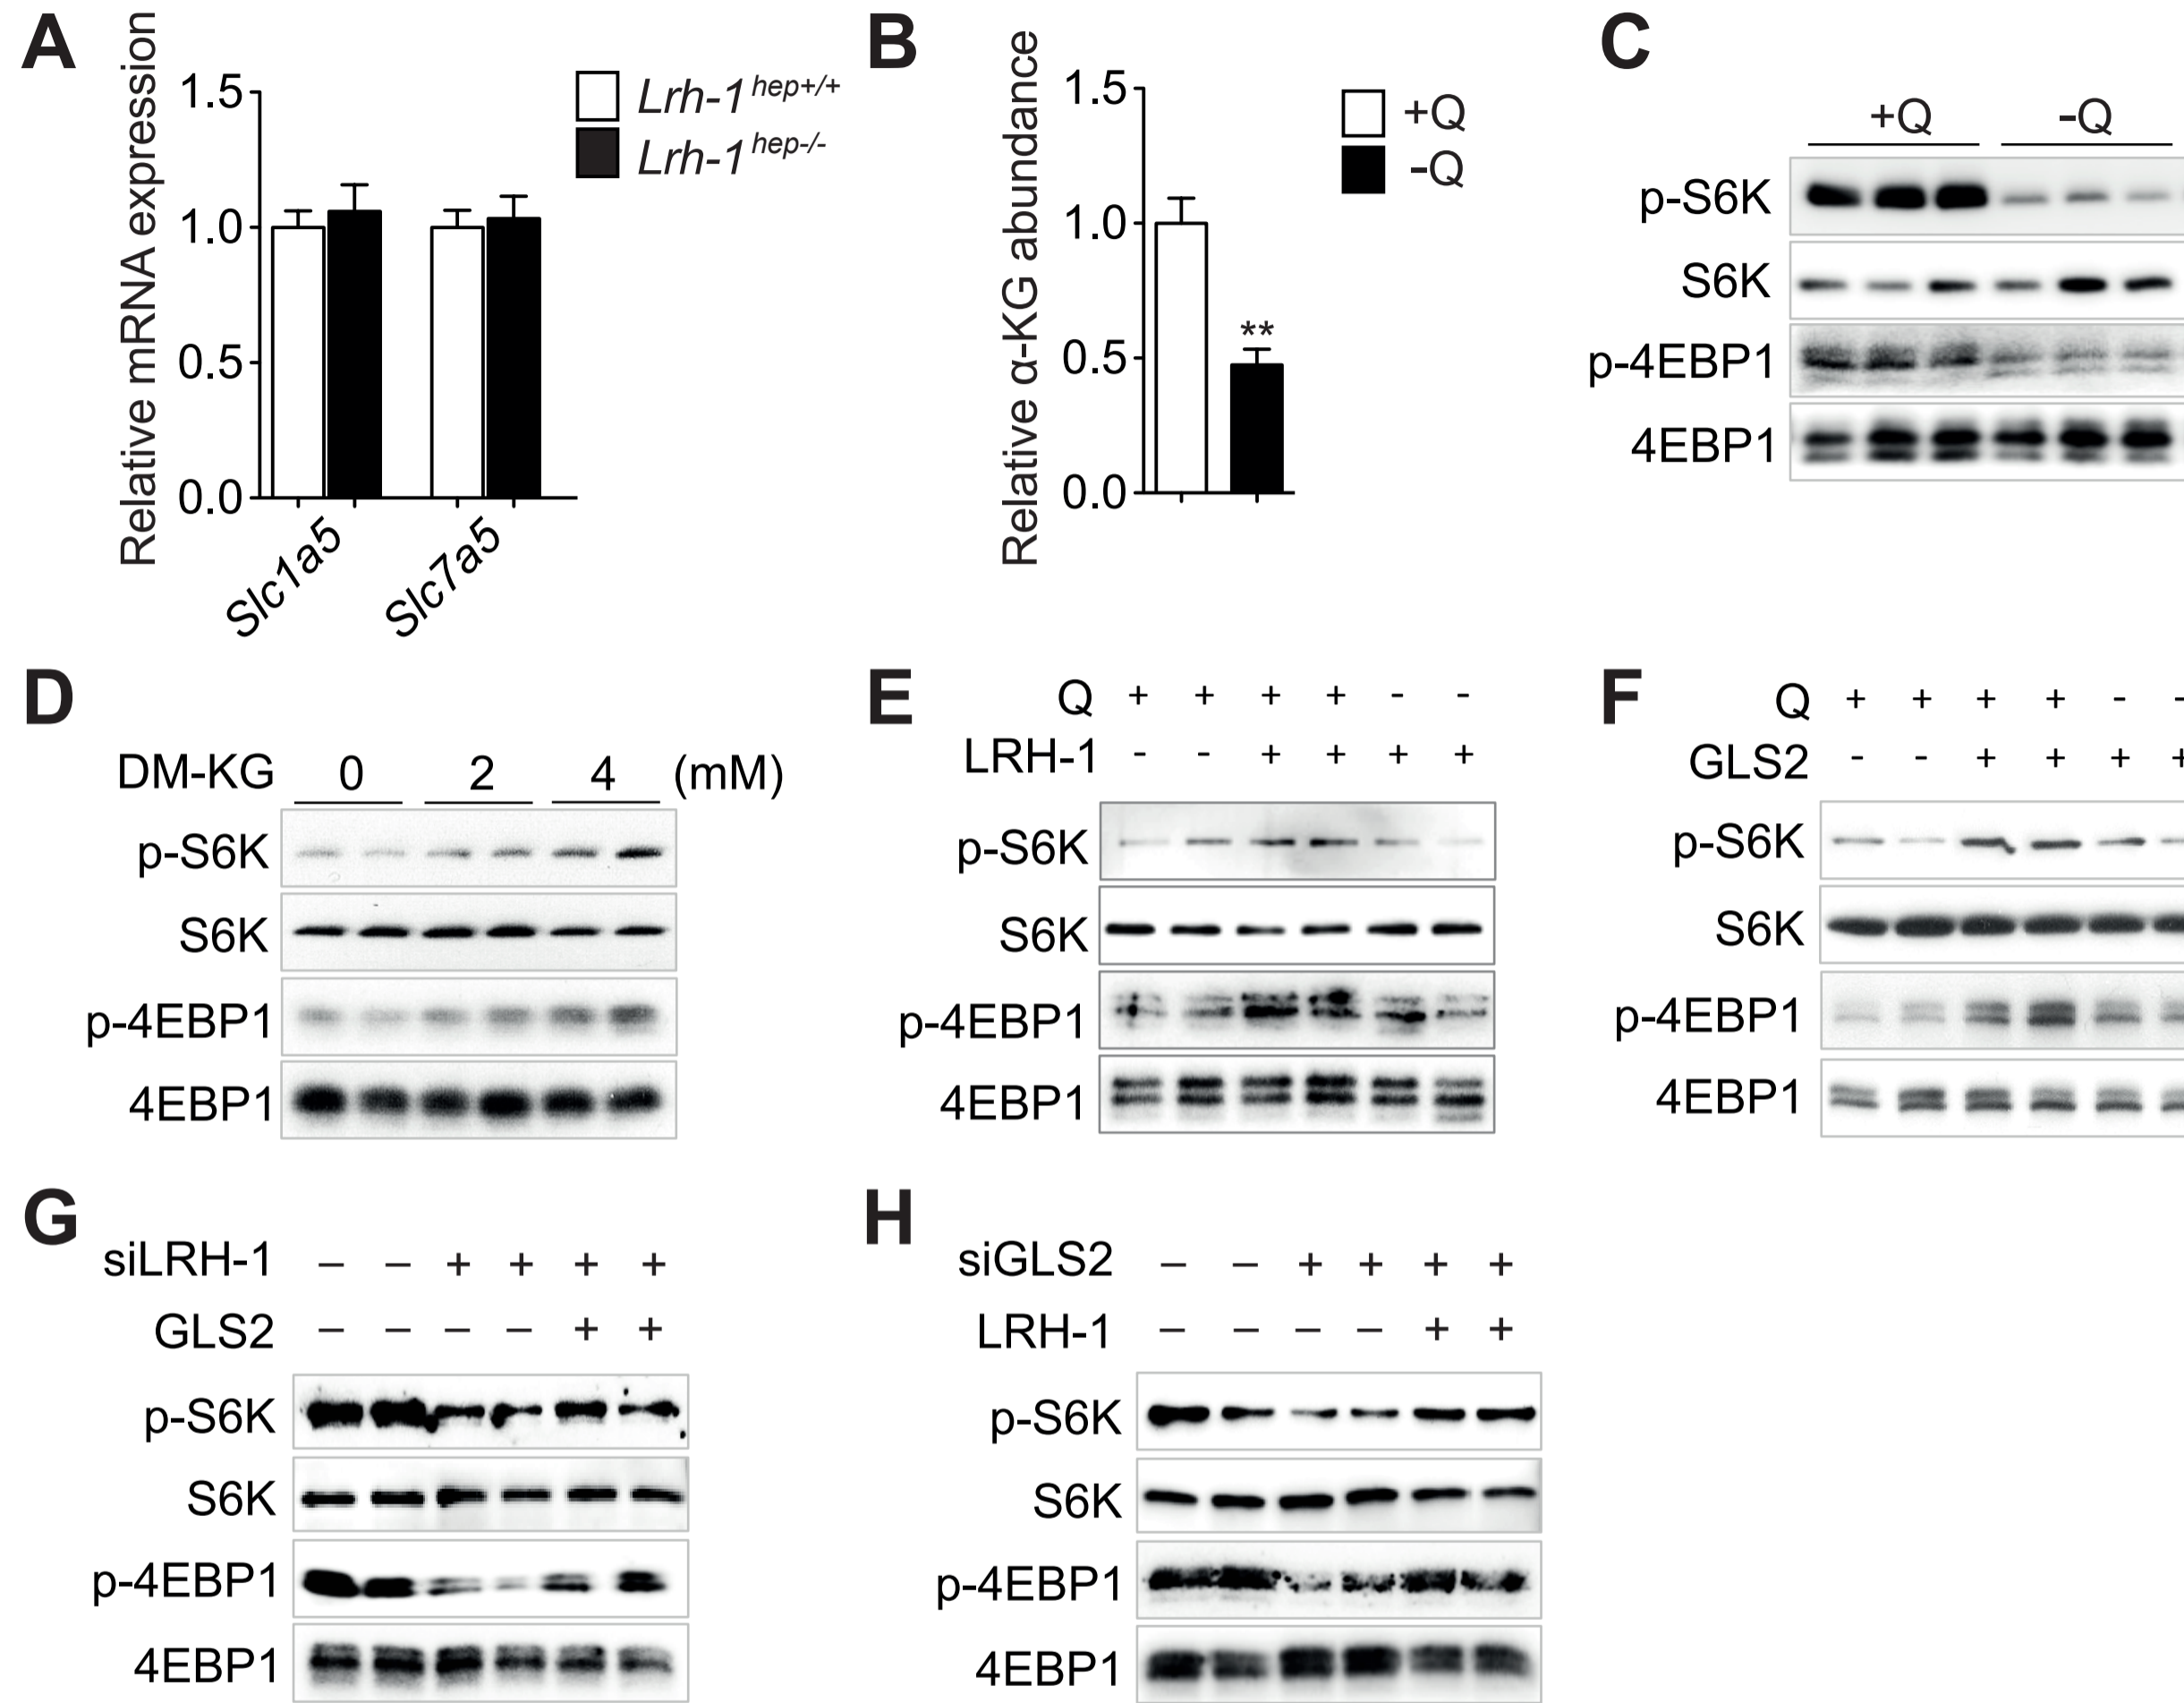

# Xu\_Supplemental Fig. 4

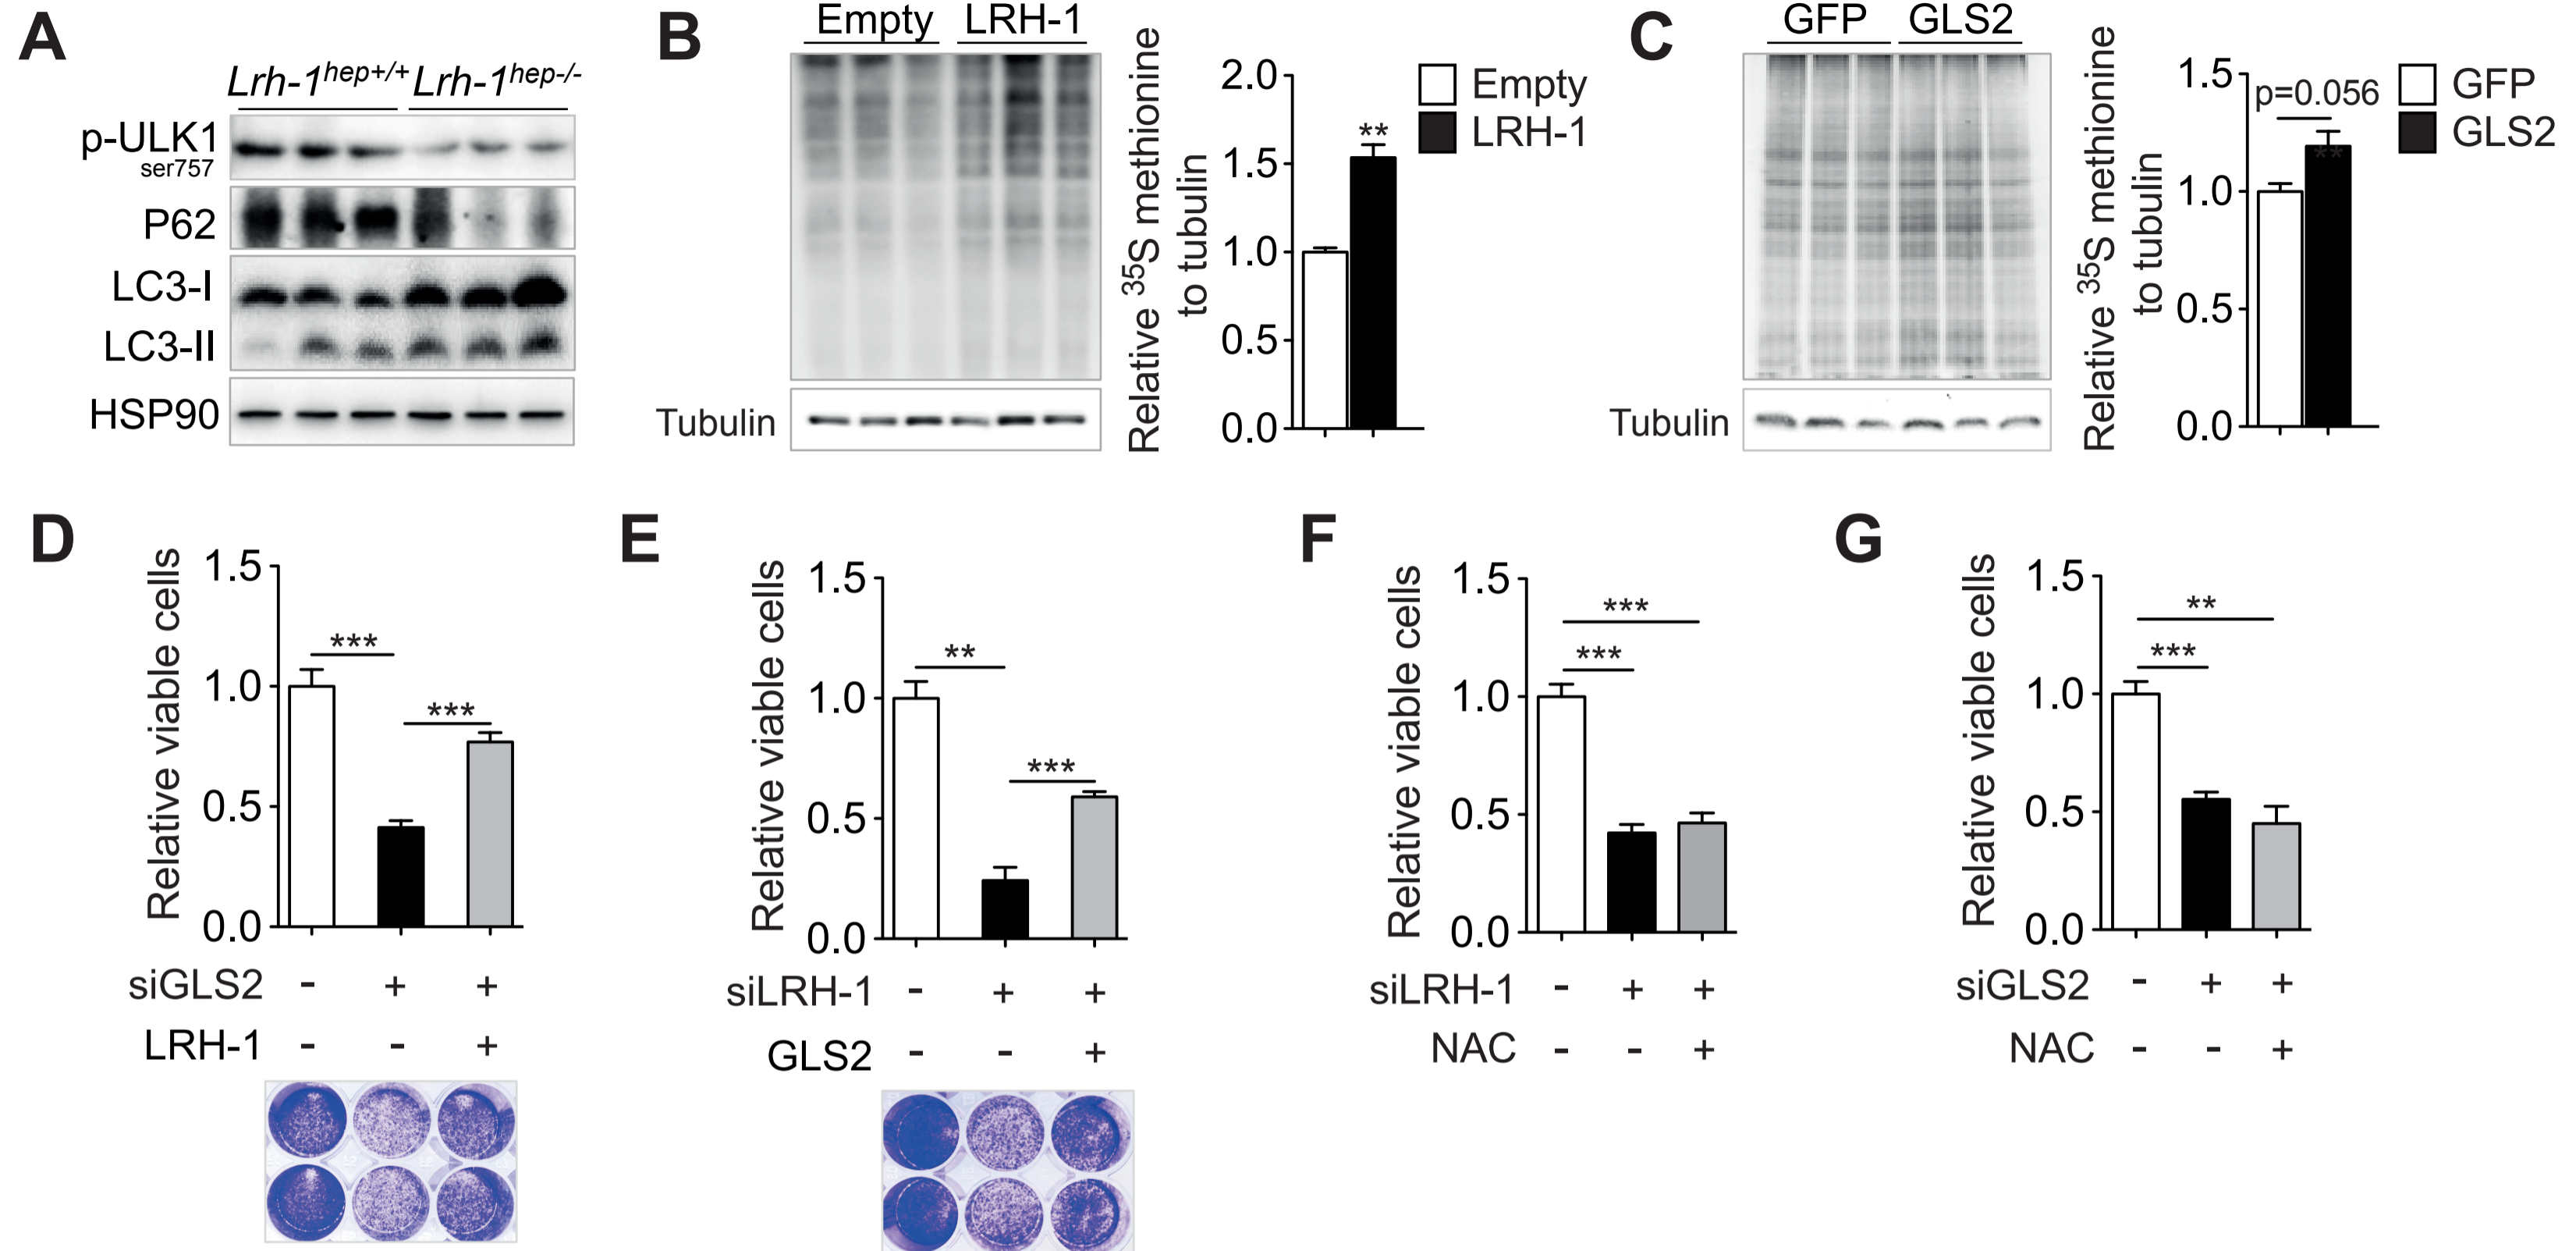

**A**

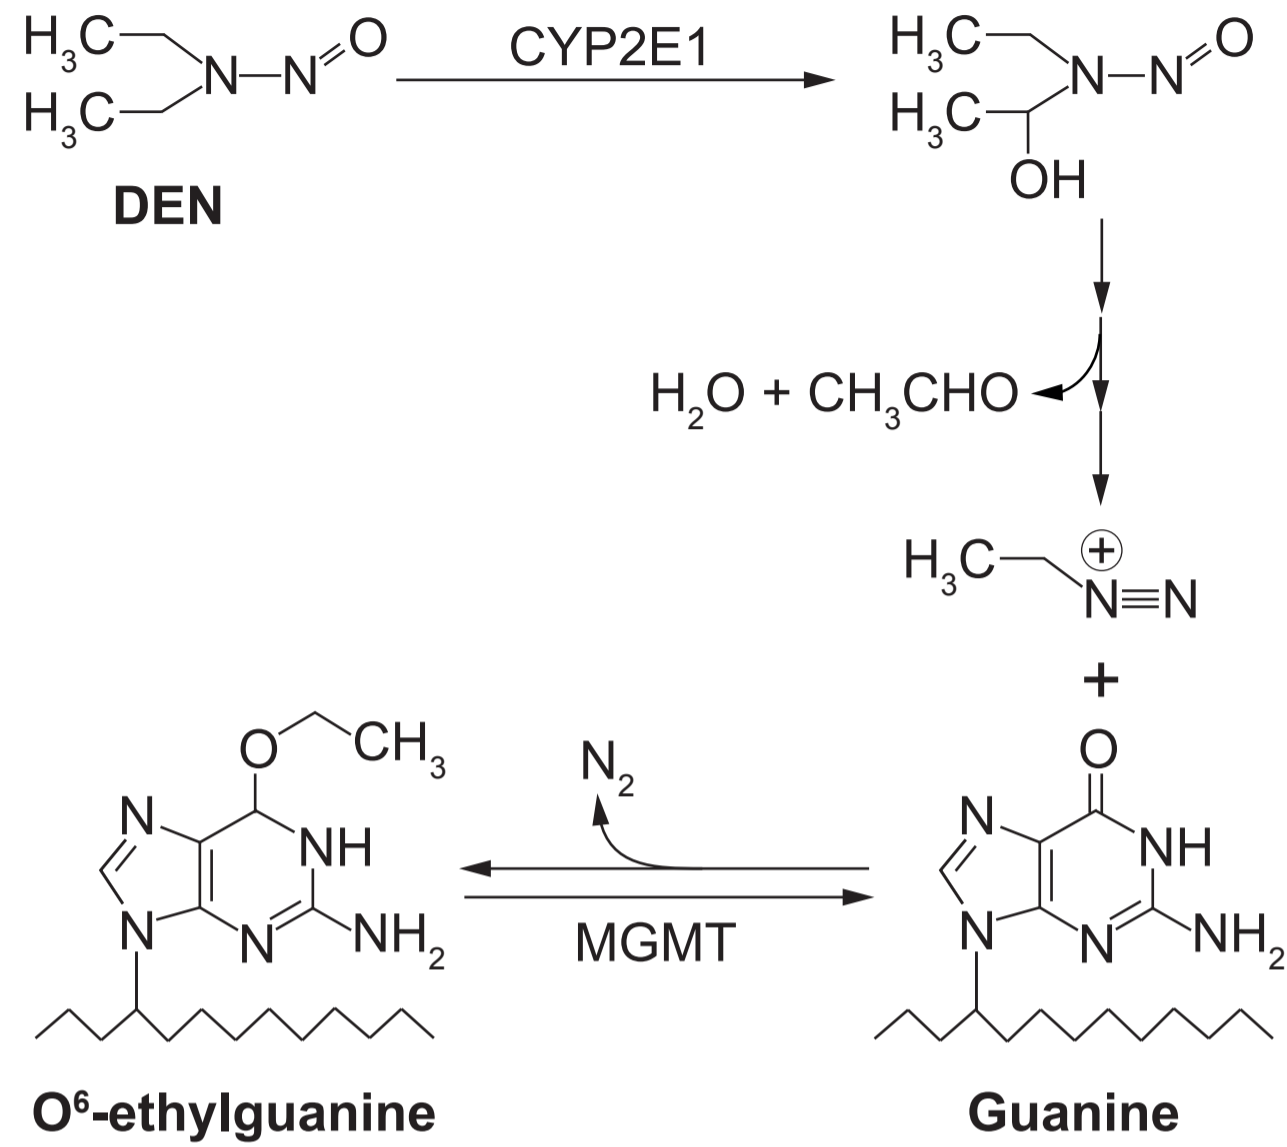

**B**

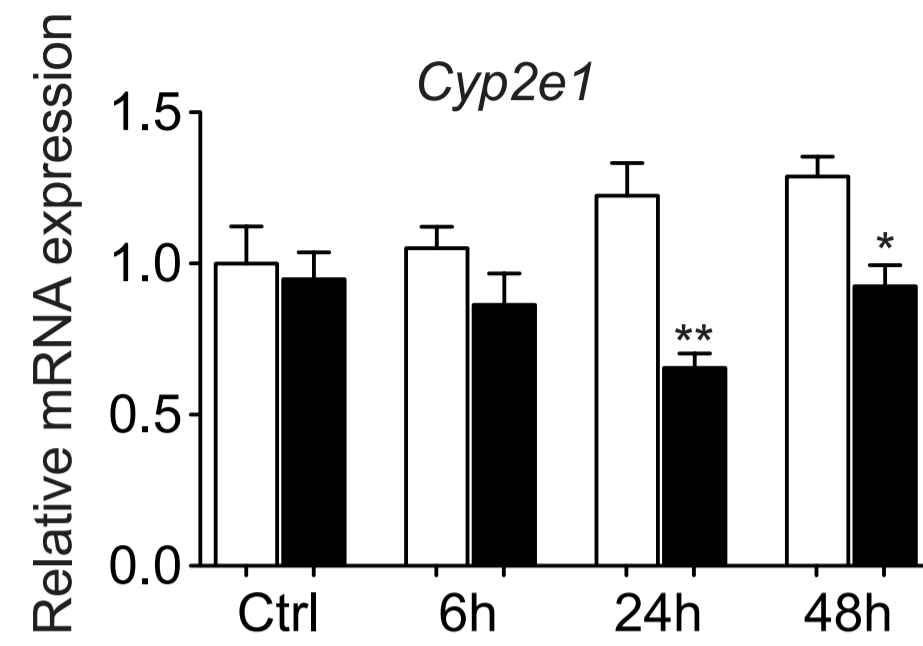

**D**

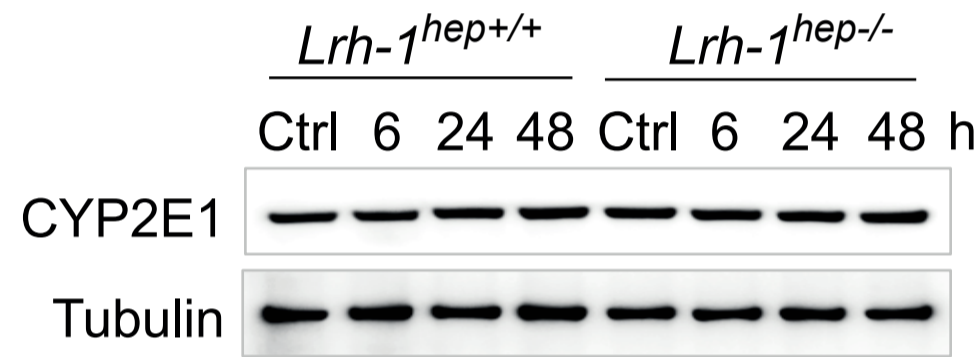

**C**

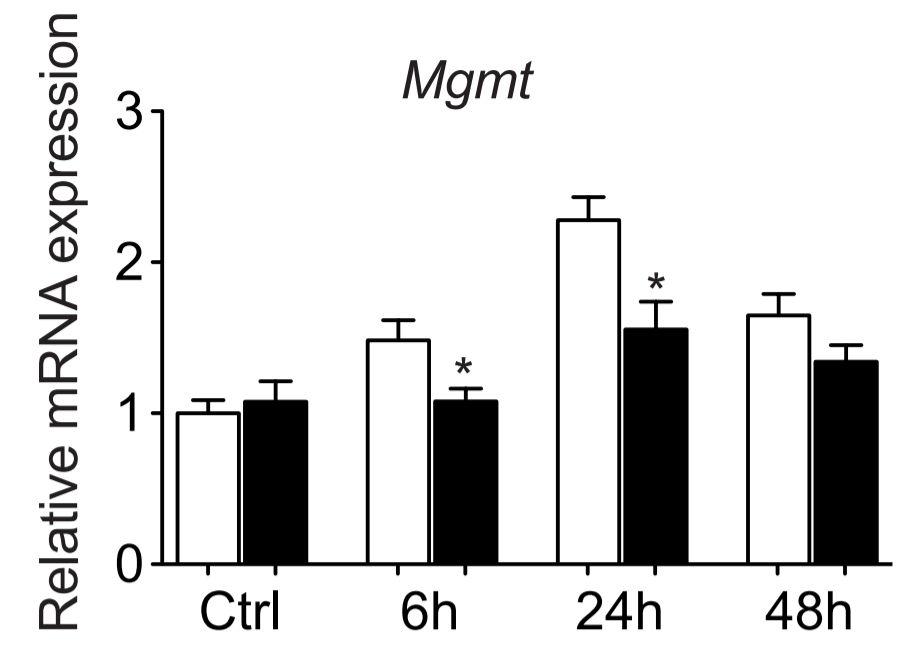

**E**

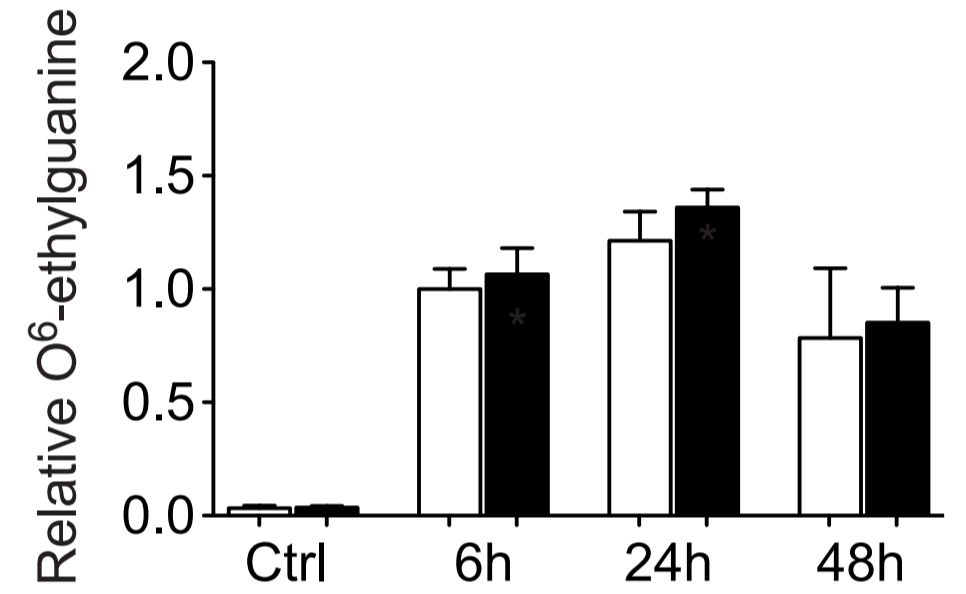

**F**

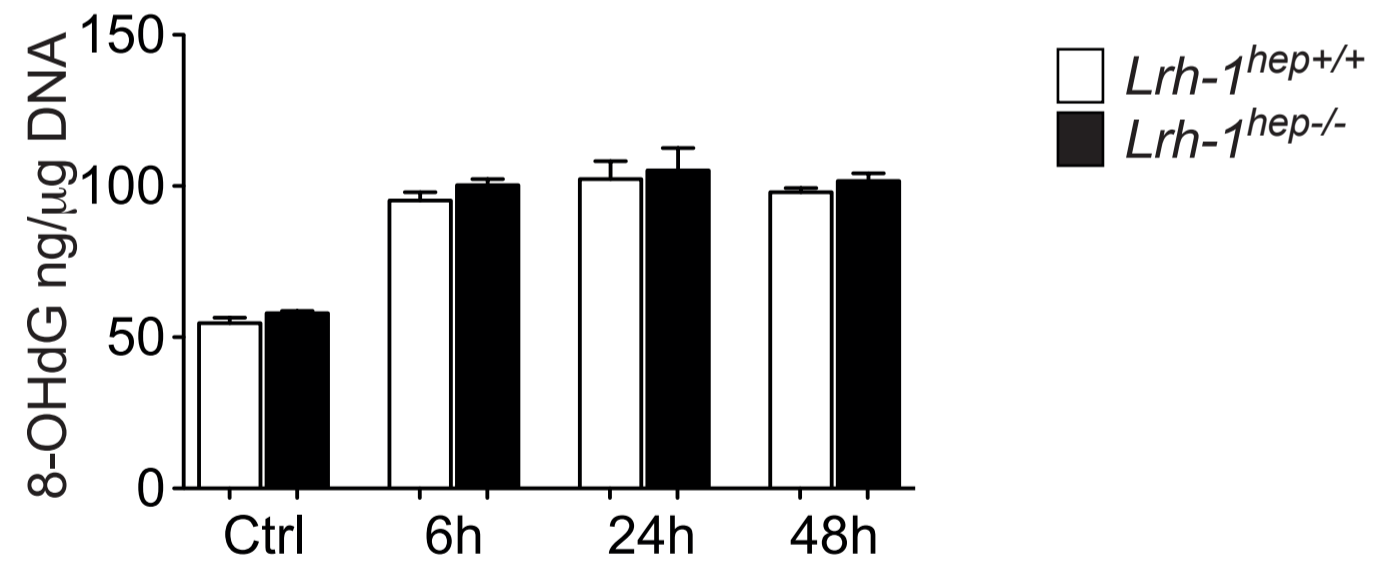

Supplement: supp_30.11.1255_Supplemental_Figure.pdf [file supp_30.11.1255_Supplemental_Figure.pdf]
